# Supplementary material for: Expression and possible role of Smad3 in postnecrotizing enterocolitis stricture
Source: HighWire-hosted journal article supplement (doi:10.1136/wjps-2021-000289), 2022-01-01
Supplement: wjps-2021-000289supp001_data_supplement.pdf [file wjps-2021-000289supp001_data_supplement.pdf]

**Additional materials(The primers used for RT-PCR are listed)****(1) qPCR Primer sequences are shown in the table below**

|                       |                        |
|-----------------------|------------------------|
| Rat-ZO-1-F1           | TTCGCCTGAAACAAACCCAG   |
| Rat-ZO-1-R1           | CTTGTGATACGTGCGAGGTG   |
| Rat-VEGF-F1           | GGAACCTAGACCTCTCACCGG  |
| Rat-VEGF-R1           | CTCTCCCTTCATGTCAGGCT   |
| Rat-TGF $\beta$ 1-F1  | GACCGCAACAACGCAATCTA   |
| Rat-TGF $\beta$ 1-R1  | ACTGCTTCCCGAATGTCTGA   |
| Rat-TNF- $\alpha$ -F1 | TCCCAGAAAAGCAAGCAACC   |
| Rat-TNF- $\alpha$ -R1 | TAGACAGAAGAGCGTGGTGG   |
| Rat-NF-kB-F1          | CGTGAGGCTGTTTGGTTTGA   |
| Rat-NF-kB-R1          | TCTGCCCTCCTGACTCTACT   |
| Rat-Smad3-F1          | CATGGGCAAATGAAAGGGCT   |
| Rat-Smad3-R1          | CCAGGGTGAAGATGACAGGT   |
| Rat-GAPDH-F1          | TGCTGAGTATGTCGTGGAGTCT |
| Rat-GAPDH-R1          | CAGTCTTCTGAGTGGCAGTGAT |

**(2) Three siRNA sequence of rat Smad3 was constructed**

|           | sense (5'-3')         | antisense (5'-3')     |
|-----------|-----------------------|-----------------------|
| siSmad3-1 | GUGAACACCAAGUGCAUUATT | UAAUGCACUUGGUGUUCACTT |
| siSmad3-2 | CCAGAGCAAUUAUCCAGAATT | UUCUGGAAUAUUGCUCUGGTT |
| siSmad3-3 | GCACAGCCACCAUGAGUUATT | UAACUCAUGGUGGCUGUGCTT |
